# Supplementary material
Source: MDPI journal article supplement (https://www.mdpi.com/2071-1050/13/3/1321)
Supplement: s1 [file s1]

## S2. Rules of Transcription

The transcription rules are adapted from Kuckartz (2010) and Rädicker and Kuckartz (2019). The transcription follows a semantic-content transcription system (Dresing and Pehl 2018), which is suitable for the sensemaking dimension, i.e., for the inference of knowledge, topics, and content.

1. The interviewing person is indicated by an "I", the interviewee by a "P".
2. Time marks are set before each speech contribution and within very long paragraphs of the interviewee, e.g. "time mark P: ...".
3. The beginning and end of each interview are always listened to completely, but only transcribed if they contain content-relevant remarks.
4. Vocalizations of the interviewee are noted in simple brackets, e.g. (laughs), (groans) and the like. Short content-related remarks interrupting the speech of the other person are integrated into the transcription in form of brackets, marked with "I" or "P" in front of it.
5. Agreeing or confirming utterances of the interviewer, e.g. "mhm" or "aha" are not transcribed, as long as they do not interrupt the flow of speech of the interviewee.
6. Parallel speech does not have to be marked, but is noted as if the persons were speaking one after the other.
7. The transcription is **word-for-word**, i.e., not phonetic or summarizing. Repeated words, broken words and sentences are also noted.
8. The language is smoothed, i.e. approximated to written German. Expressive dialect expressions that are difficult to translate are, however, included.
9. Punctuation is also smoothed, i.e. punctuation marks are used so that the text is easy to read, e.g. separate long nested sentences should be separated using commas to distinguish main and subordinate clauses. Question marks are only used if the tone of the question is clear, exclamation marks only if the tone of the exclamation is clear.
10. **Significant pauses** are marked by bracketed ellipsis dots (...). For longer pauses, a number corresponding to the duration in seconds is given, e.g. (10).
11. Non-understandable words and passages are indicated by (unv.). If a wording is assumed, it is included in the parenthesis after a colon, e.g. (unv: assumed wording).
12. Perceived external disturbances are noted in brackets, indicating the cause, e.g. (cell phone rings).
13. All information that allows conclusions to be drawn about the person interviewed will be anonymized.

## Short rules

|                         |                                          |
|-------------------------|------------------------------------------|
| I:                      | Interviewer                              |
| P:                      | Interviewee (Participant)                |
| (laughter)              | Laughter                                 |
| (unv.)                  | Wording not understandable               |
| (unv: presumed wording) | Presumed wording                         |
| (...)                   | Short break                              |
| (10)                    | Very long break, in this case 10 seconds |
| <b>Word</b>             | Particularly emphasized                  |
| (I: Ah yes)             | Interruption by the interviewer          |
